# Supplementary material for: Risk-associated alterations in marrow T cells in pediatric leukemia
Source: JCI Insight. 2020 Aug 20;5(16):e140179. doi: 10.1172/jci.insight.140179 (PMC7455136; doi:10.1172/jci.insight.140179)
Supplement: Supplemental data [file jciinsight-5-140179-s196.pdf]

# Supplementary Data

## Table of Contents

|                |                                                                                                |
|----------------|------------------------------------------------------------------------------------------------|
| <b>Tables</b>  |                                                                                                |
| Table S1       | Summary of Patient Characteristics                                                             |
| Table S2       | Mass Cytometry Antibodies                                                                      |
| <b>Figures</b> |                                                                                                |
| Figure S1      | Mass Cytometry Phenotypes of Bone Marrow T Cells in Childhood Leukemia.                        |
| Figure S2      | SPADE Analysis of Bone Marrow T Cells                                                          |
| Figure S3      | Immune Clusters Based on Bone Marrow T Cell Phenotypes in AML                                  |
| Figure S4      | Heatmap of Single-Cell RNA Sequencing Differential Gene Expression and T Cell Pathway Analysis |

**Table S1. Summary of patient characteristics**

|                                      | <b>B-ALL (n=36)</b> | <b>AML (n=28)</b> | <b>HD (n=11)</b> |
|--------------------------------------|---------------------|-------------------|------------------|
| Age mean (range)                     | 8 (2-18)            | 10.5 (1.6-18)     | 23 (18-30)       |
| Gender                               |                     |                   |                  |
| Male                                 | 20 (56%)            | 16 (57%)          | 7 (64%)          |
| Female                               | 16 (44%)            | 12 (43%)          | 4 (36%)          |
| Risk (B-ALL) <sup>1</sup>            |                     |                   |                  |
| HR                                   | 14 (39%)            | -                 | -                |
| SR                                   | 22 (61%)            | -                 | -                |
| Risk (AML) <sup>2</sup>              |                     |                   |                  |
| HR                                   | -                   | 14 (50%)          | -                |
| LR                                   | -                   | 14 (50%)          | -                |
| CNS Positive                         | 8 (22%)             | 8 (29%)           | -                |
| Cytogenetics                         |                     |                   |                  |
| ETV6-RUNX1                           | 8 (22%)             | -                 | -                |
| Trisomy (4, 10)                      | 3 (8%)              | -                 | -                |
| inv(16)/t(16;16)                     |                     | 7 (25%)           |                  |
| 11q23 (KMT2A)                        | -                   | 3 (11%)           |                  |
| t(8;21)(q22;q22)                     | -                   | 5 (18%)           |                  |
| Monosomy 7                           | -                   | 1(4%)             |                  |
| Molecular Alterations                |                     |                   |                  |
| FLT3-ITD                             | -                   | 10 (36%)          | -                |
| NPM1 mutated                         |                     | 2(7%)             |                  |
| MRD status End<br>Induction I (n=28) |                     |                   |                  |
| CR                                   | -                   | 14 (50%)          | -                |
| PR                                   | -                   | 3 (10%)           | -                |
| PD                                   | -                   | 11 (40%)          | -                |

Abbreviations: HD = healthy donor, HR = high-risk, SR = standard risk, LR = low-risk, MRD = minimal residual disease, CR = complete remission (<5% blasts), PR = partial remission (5-15% blasts), PD = persistent disease (>15% blasts).

Risk Classification<sup>1,2</sup>: B-ALL high-risk: Age  $\geq 10$  years; WBC  $\geq 50,000/\mu\text{l}$ ; B-ALL standard risk: Age 1.0-9.99 years; WBC  $\leq 50,000/\mu\text{l}$ , based on findings at presentation. AML-low risk: favorable genetics including t(8;21); inv16, mutated NPM1 with wild-type FLT3, mutated CEBPA (normal karyotype). AML- high risk: Unfavorable genetics including FLT3-high internal tandem duplication allelic ratio, monosomy 7, monosomy 5, 5q deletions, KMT2A rearrangements, complex karyotype and residual disease following induction therapy.

**Table S2.** Mass Cytometry Antibodies.

|    | <b>Antibody</b> | <b>Clone</b> | <b>Supplier</b> |    | <b>Antibody</b> | <b>Clone</b> | <b>Supplier</b> |
|----|-----------------|--------------|-----------------|----|-----------------|--------------|-----------------|
| 1  | 4-1BB           | 4B4-1        | Biolegend       | 24 | CD95            | DX2          | Fluidigm        |
| 2  | BTLA            | MIH26        | Fluidigm        | 25 | CTLA4           | 14D3         | Fluidigm        |
| 3  | CCR7            | G043H7       | Fluidigm        | 26 | CXCR5           | 12G5         | Fluidigm        |
| 4  | CD103           | Ber-ACT8     | Fluidigm        | 27 | DNAM1           | TX25         | Biolegend       |
| 5  | CD11c           | Bu15         | Fluidigm        | 28 | FOXP3           | PCH101       | Fluidigm        |
| 6  | CD127           | A019D5       | Fluidigm        | 29 | GATA3           | TWAJ         | Fluidigm        |
| 7  | CD14            | RM052        | Fluidigm        | 30 | Granzyme        | GB11         | Fluidigm        |
| 8  | CD16            | 3G8          | Fluidigm        | 31 | HLA-DR          | L243         | Fluidigm        |
| 9  | CD19            | HIB19        | Fluidigm        | 32 | ICOS            | C398.4A      | Fluidigm        |
| 10 | CD200           | OX-104       | Fluidigm        | 33 | Ki67            | Ki-67        | Fluidigm        |
| 11 | CD25            | 2A3          | Fluidigm        | 34 | LAG3            | 11C3C65      | Fluidigm        |
| 12 | CD27            | L128         | Fluidigm        | 35 | NKG2A           | Z199         | Beckman Coulter |
| 13 | CD3             | UCHT1        | Fluidigm        | 36 | NKG2C           | 134591       | R&D Systems     |
| 14 | CD33            | WM53         | Fluidigm        | 37 | NKG2D           | OW72         | Fluidigm        |
| 15 | CD38            | HIT2         | Fluidigm        | 38 | OX40            | ACT35        | Fluidigm        |
| 16 | CD4             | RPA-T4       | Fluidigm        | 39 | PD1             | EH12.2H7     | Fluidigm        |
| 17 | CD45            | HI30         | Fluidigm        | 40 | PDL1            | 29E.2A3      | Fluidigm        |
| 18 | CD45RA          | HI100        | Fluidigm        | 41 | Perforin        | B-D48        | Fluidigm        |
| 19 | CD45RO          | UCHL1        | Fluidigm        | 42 | T-Bet           | 4B10         | Fluidigm        |
| 20 | CD56            | HCD56        | Biolegend       | 43 | TCF1            | 7F11A10      | Biolegend       |
| 21 | CD57            | HCD57        | Biolegend       | 44 | TIGIT           | MBSA43       | Fluidigm        |
| 22 | CD69            | FN50         | Fluidigm        | 45 | TIM3            | F38-2E2      | Fluidigm        |
| 23 | CD8             | RPA-T8       | Fluidigm        |    |                 |              |                 |

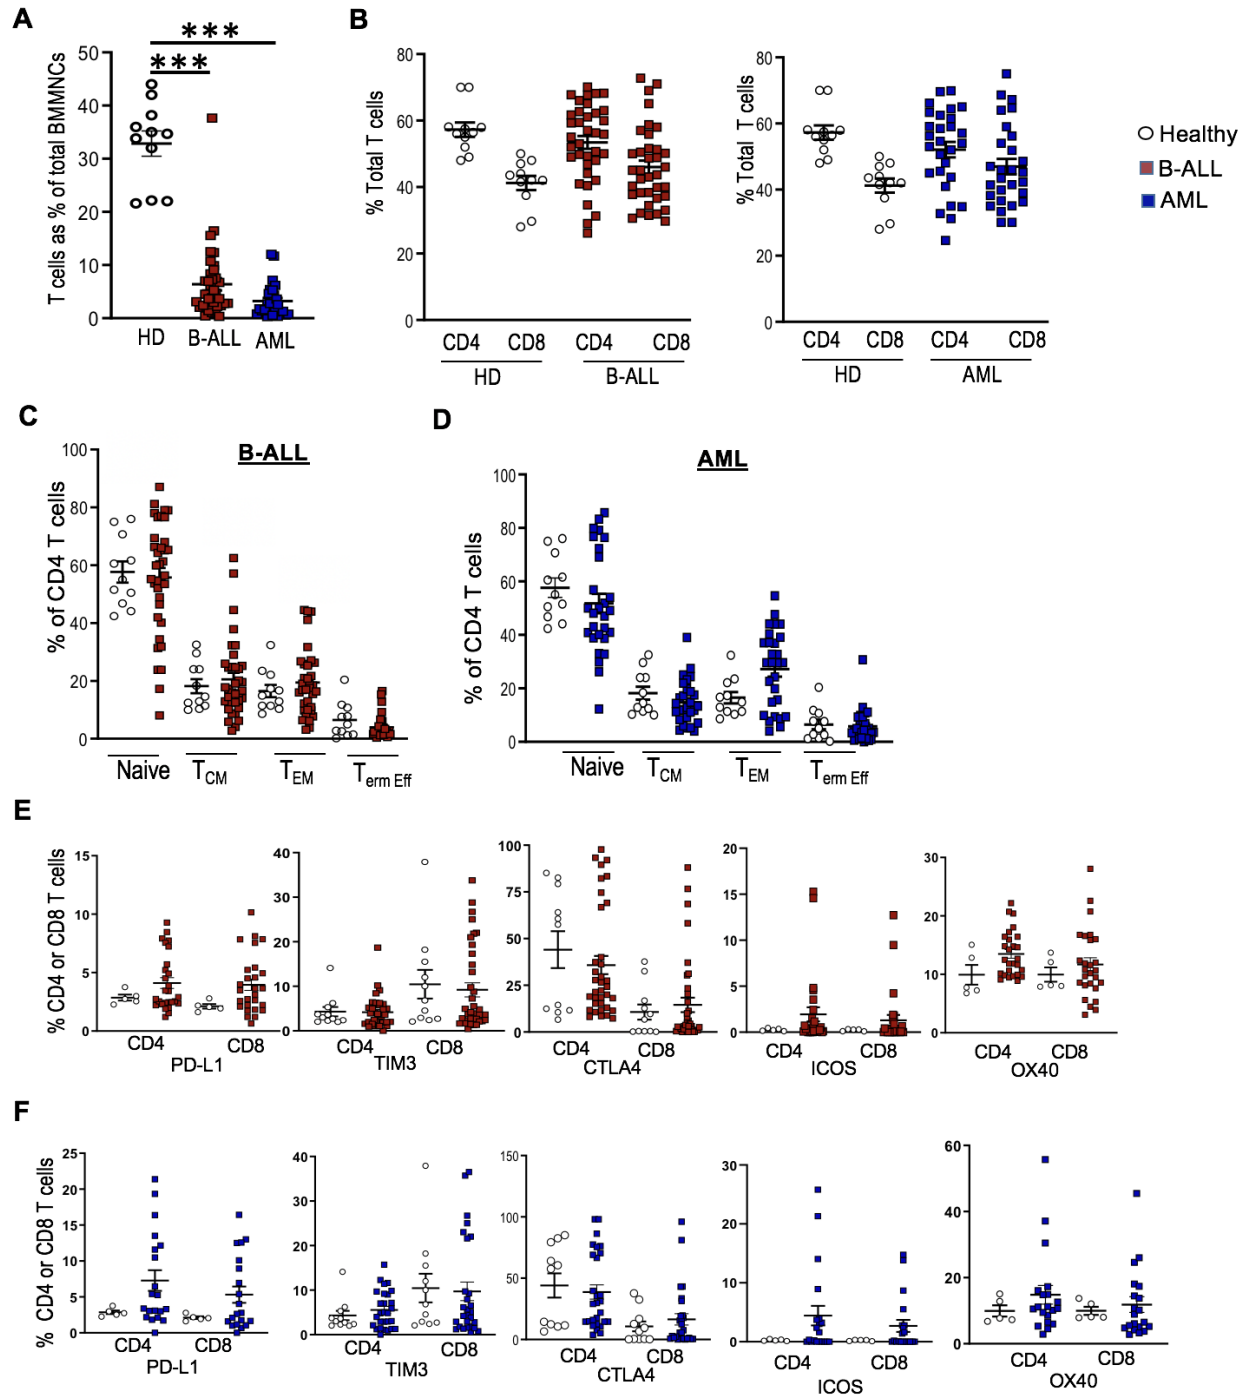

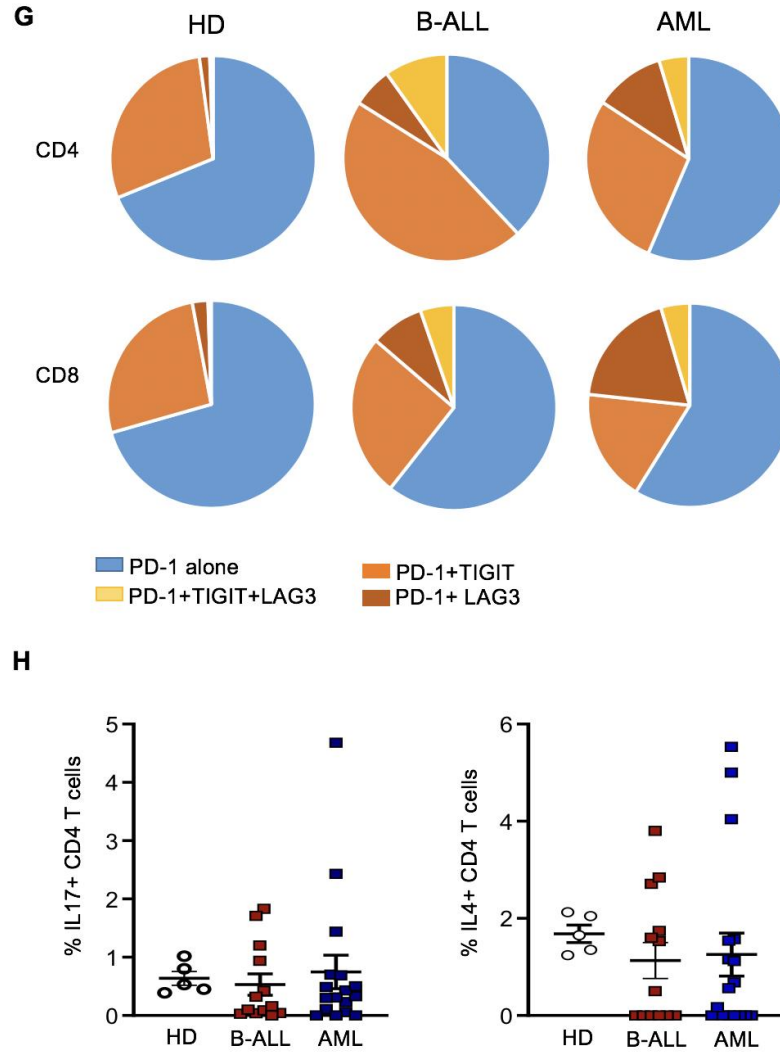

**Figure S1.** Mass Cytometry Phenotypes of Bone Marrow T Cells in Childhood Leukemia.

Bone marrow mononuclear cells (BMMNCs) from patients with B-ALL (n=36), AML (n=28) and healthy donors (HD) (n=5-11) were characterized using single cell mass cytometry. **(A)** T cells as percent of total BMMNCs in HD, B-ALL, and AML bone marrow. **(B)** CD4 and CD8 T cells as percent of total T cells in HD, B-ALL, and AML bone marrow. **(C)** Naïve, central memory ( $T_{CM}$ ), effector memory ( $T_{EM}$ ) and terminal effectors ( $T_{TERM\ EFF}$ ) CD4 T cells as percent of total CD4 T cells in B-ALL bone marrow. **(D)** Naïve, central memory ( $T_{CM}$ ), effector memory ( $T_{EM}$ ) and terminal effectors ( $T_{TERM\ EFF}$ ) CD4 T cells as percent of total CD4 T cells in AML bone marrow. **(E)** Percent of total CD4 or CD8 T cells expressing PD-L1, TIM3, CTLA4, ICOS, and OX40 in B-ALL and HD bone marrow (n=5 for PD-L1, ICOS, OX40). **(F)** Percent of total CD4 or CD8 T cells expressing PD-L1, TIM3, CTLA4, ICOS, and OX40 in AML and HD bone marrow (n=5 for PD-L1, ICOS, OX40). **(G)** Proportion of PD-1-expressing T cells co-expressing other inhibitory checkpoint molecules TIGIT and/or LAG3 in HD, B-ALL, and AML bone marrow. **(H)** Percent of total CD4 T cells expressing IL17 and IL4 in HD (n=5), B-ALL, and AML bone marrow. \*\*\*p<0.001, Mann-Whitney test.

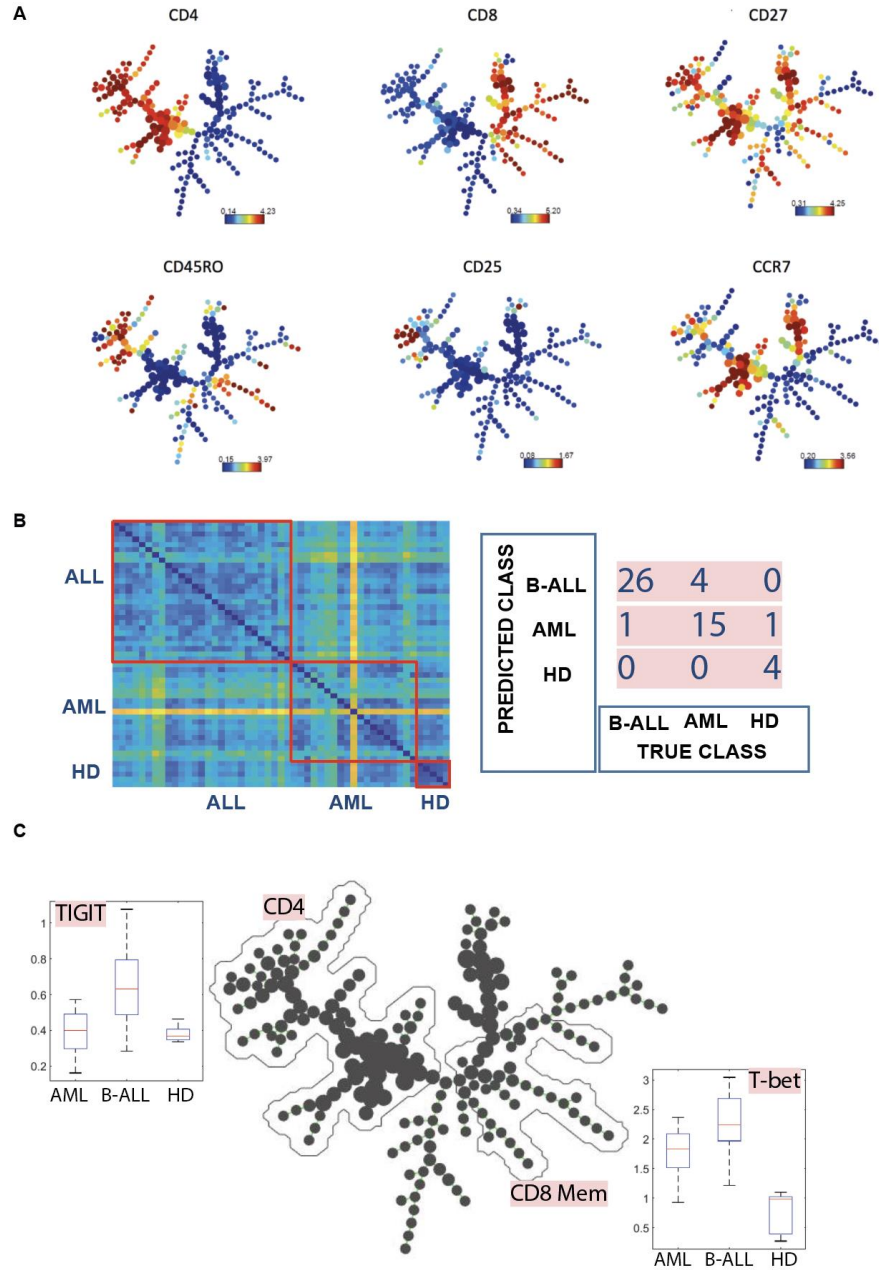

**Figure S2.** SPADE Analysis of Bone Marrow T Cells.

(A) Spanning tree progression analysis for density normalized events (SPADE) trees were generated showing expression of T cell surface markers measured by mass cytometry. These colored regions were used to partition the tree based on known T cell phenotypes. (B) Heatmap and confusion table showing ability of SPADE analysis to distinguish B-ALL, AML, and HD samples based on T cells alone. (C) SPADE tree showing different nodes with each node representing a unique T cell subset. Figure demonstrates TIGIT expression on CD4 T cells (B-ALL vs AML  $p=2.4 \times 10^{-6}$ , signal to noise ratio or SNR=1.4; and B-ALL vs HD  $p=0.004$ , SNR=1.4) and T-bet expression in CD8 memory T cells (B-ALL vs HD  $p=6.4 \times 10^{-8}$ , SNR=3.4; and AML vs HD  $p=8.3 \times 10^{-5}$ , SNR=2.3).

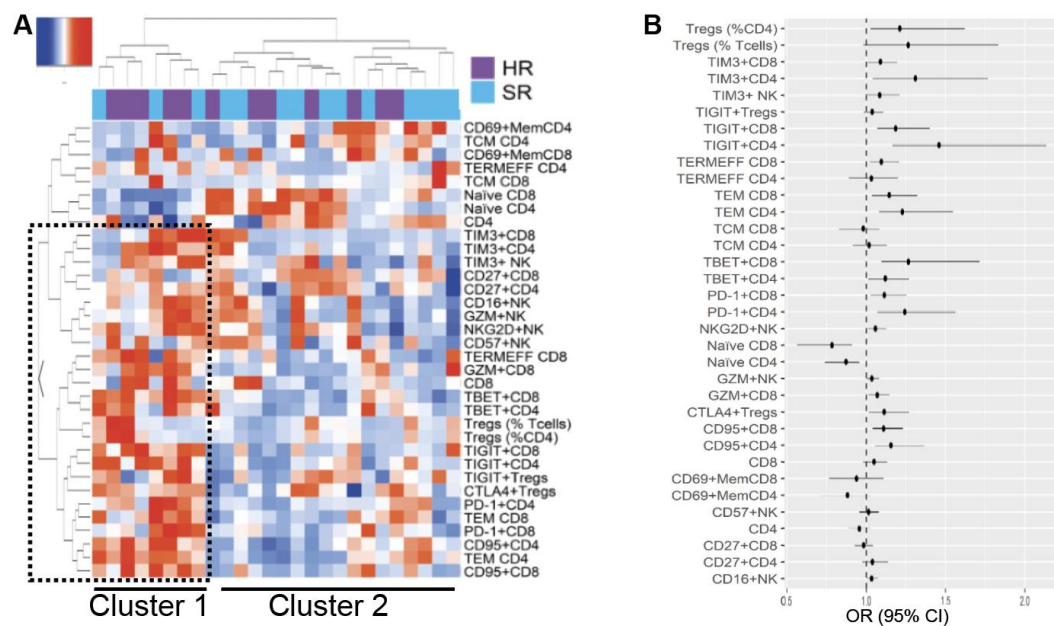

**Figure S3.** Immune Clusters Based on Bone Marrow T Cell Phenotypes in AML.

(A) Hierarchical cluster analysis based on mass cytometry immune markers in AML. (B) Forest plot showing regression analysis of markers linked to immune clusters in AML.

A

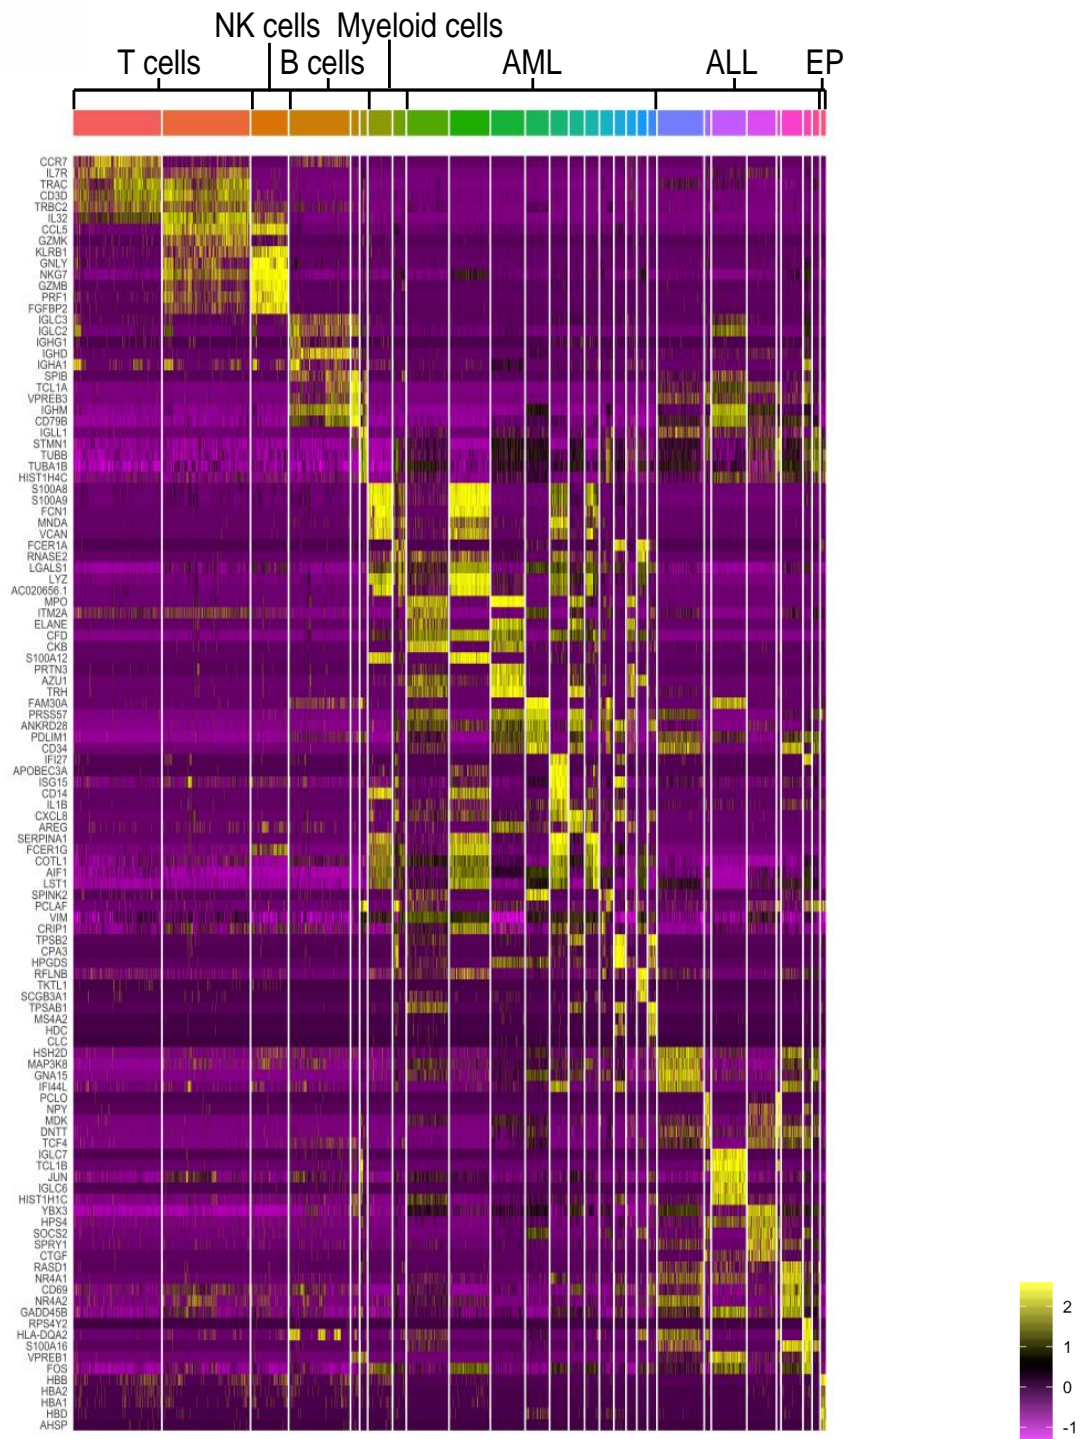

**B**

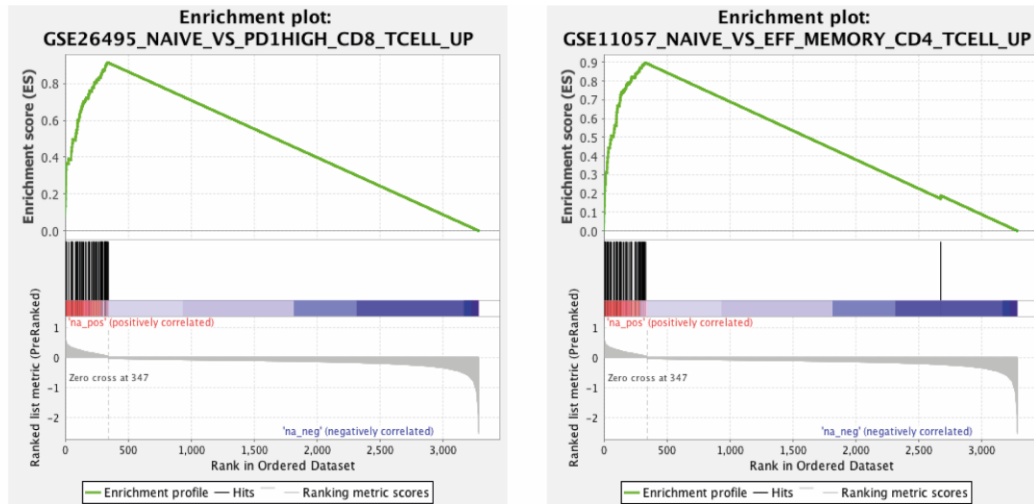

| Gene set ID                     | Enriched Cluster | Description                                                | Nominal p-value | PMID     |
|---------------------------------|------------------|------------------------------------------------------------|-----------------|----------|
| GSE26945<br>(shown above left)  | T1               | Genes up-regulated in naïve vs PD-1 high CD8 T cells       | p<0.0001        | 21383243 |
| GSE11057<br>(shown above right) | T1               | Genes up-regulated in naïve vs effector memory CD4 T cells | p<0.0001        | 19568420 |
| KAECH                           | T2               | Genes up-regulated in effector vs naïve CD8 T cells        | p<0.0001        | 12526810 |
| GSE45739                        | T2               | Genes upregulated in activated vs unstimulated CD4 T cells | p<0.0001        | 23755101 |

**Figure S4.** Heatmap of Single-Cell RNA Sequencing Differential Gene Expression and T Cell Pathway Analysis.

(A) Zero-centered gene expression of significantly (Wilcoxon rank-sum test with Bonferroni correction  $p<0.05$ ) highly differentially expressed genes defining clusters (selected by largest average log-fold change in expression between each cluster and all other cells). NK=natural killer, AML=acute myeloid leukemia, ALL=acute lymphoblastic leukemia, EP=erythroid progenitor. (B) GSEA pathway analysis of significantly differentially expressed genes (Wilcoxon rank-sum test  $p<0.05$  with Bonferroni correction) between T cell clusters T1 (enriched in HD and low-risk ALL) and T2 (enriched in high-risk ALL and AML) revealed up-regulation of pathways associated with naïve T cells in cluster T1 relative to pathways associated with PD-1 high and effector T cells in cluster T2.
